# Supplementary material for: Combating pancreatic cancer with ovarian cancer cells
Source: Aging (Albany NY). 2023 Mar 23;15(6):2189–207. doi: 10.18632/aging.204608 (PMC10085619; doi:10.18632/aging.204608)
Supplement: Supplementary File 4 [file aging-15-204608-s002.xlsx]

## Sheet: Supplementary File S4
Supplementary File 4. The enriched transcription factor of DEGs.
Term	FDR
NR5A2 human tf ARCHS4 coexpression	4.48e-09
ZSCAN18 human tf ARCHS4 coexpression	1.48e-07
CSDC2 human tf ARCHS4 coexpression	1.48e-07
DPF1 human tf ARCHS4 coexpression	1.48e-07
MYT1 human tf ARCHS4 coexpression	5.03e-07
NR1D1 human tf ARCHS4 coexpression	5.99e-07
MEOX2 human tf ARCHS4 coexpression	5.23e-06
FOXC2 human tf ARCHS4 coexpression	1.21e-05
THRA human tf ARCHS4 coexpression	1.21e-05
MEIS3 human tf ARCHS4 coexpression	1.21e-05
ZIC1 human tf ARCHS4 coexpression	1.21e-05
FOXJ1 human tf ARCHS4 coexpression	1.21e-05
DZIP1L human tf ARCHS4 coexpression	1.21e-05
RFX2 human tf ARCHS4 coexpression	3.77e-05
ZNF474 human tf ARCHS4 coexpression	3.77e-05
PTF1A human tf ARCHS4 coexpression	6.98e-05
OSR1 human tf ARCHS4 coexpression	8.5e-05
PRRX1 human tf ARCHS4 coexpression	8.5e-05
BARHL1 human tf ARCHS4 coexpression	8.5e-05
DEAF1 human tf ARCHS4 coexpression	8.5e-05
RGS11 human tf ARCHS4 coexpression	8.5e-05
ARNT2 human tf ARCHS4 coexpression	8.5e-05
SCRT1 human tf ARCHS4 coexpression	8.5e-05
HEYL human tf ARCHS4 coexpression	9.73e-05
RBPJL human tf ARCHS4 coexpression	0.000128
LARP6 human tf ARCHS4 coexpression	0.000216
TBX5 human tf ARCHS4 coexpression	0.000216
TBX20 human tf ARCHS4 coexpression	0.000216
PAX9 human tf ARCHS4 coexpression	0.000216
RAPGEF4 human tf ARCHS4 coexpression	0.000216
BARHL2 human tf ARCHS4 coexpression	0.000508
NFATC4 human tf ARCHS4 coexpression	0.000561
NR2F2 human tf ARCHS4 coexpression	0.000561
TWIST1 human tf ARCHS4 coexpression	0.000561
TRIM3 human tf ARCHS4 coexpression	0.000561
SLC22A4 human tf ARCHS4 coexpression	0.000577
ZNF440 human tf ARCHS4 coexpression	0.000578
GLIS1 human tf ARCHS4 coexpression	0.00128
PRRX2 human tf ARCHS4 coexpression	0.00128
SNAI2 human tf ARCHS4 coexpression	0.00128
OSR2 human tf ARCHS4 coexpression	0.00128
SIX2 human tf ARCHS4 coexpression	0.00128
ZNF536 human tf ARCHS4 coexpression	0.00128
ZNF488 human tf ARCHS4 coexpression	0.00128
NR2F1 human tf ARCHS4 coexpression	0.00128
ZIC4 human tf ARCHS4 coexpression	0.00128
TUB human tf ARCHS4 coexpression	0.00128
POU6F1 human tf ARCHS4 coexpression	0.00128
ZNF365 human tf ARCHS4 coexpression	0.00128
EMX1 human tf ARCHS4 coexpression	0.00128
TSHZ3 human tf ARCHS4 coexpression	0.00295
ATOH8 human tf ARCHS4 coexpression	0.00295
FBN1 human tf ARCHS4 coexpression	0.00295
MKX human tf ARCHS4 coexpression	0.00295
SOX8 human tf ARCHS4 coexpression	0.00295
SSH1 human tf ARCHS4 coexpression	0.00295
PAX5 human tf ARCHS4 coexpression	0.00295
OLIG1 human tf ARCHS4 coexpression	0.00295
CAMTA1 human tf ARCHS4 coexpression	0.00295
SOHLH1 human tf ARCHS4 coexpression	0.00295
EBF3 human tf ARCHS4 coexpression	0.00295
TP73 human tf ARCHS4 coexpression	0.00295
CUX2 human tf ARCHS4 coexpression	0.00295
ZNF473 human tf ARCHS4 coexpression	0.00295
TEF human tf ARCHS4 coexpression	0.006
NKX6-2 human tf ARCHS4 coexpression	0.006
FOXF1 human tf ARCHS4 coexpression	0.00664
MLXIPL human tf ARCHS4 coexpression	0.00664
MEOX1 human tf ARCHS4 coexpression	0.00664
TBX18 human tf ARCHS4 coexpression	0.00664
BCL6B human tf ARCHS4 coexpression	0.00664
OLIG2 human tf ARCHS4 coexpression	0.00664
FBXO41 human tf ARCHS4 coexpression	0.00664
ZBTB7C human tf ARCHS4 coexpression	0.00664
DACH1 human tf ARCHS4 coexpression	0.00664
RGS7 human tf ARCHS4 coexpression	0.00664
TFAP2B human tf ARCHS4 coexpression	0.00664
POU3F3 human tf ARCHS4 coexpression	0.00664
NR0B2 human tf ARCHS4 coexpression	0.00752
NR1H4 human tf ARCHS4 coexpression	0.0133
ELF3 human tf ARCHS4 coexpression	0.0148
HAND2 human tf ARCHS4 coexpression	0.0148
TCF21 human tf ARCHS4 coexpression	0.0148
TERF2IP human tf ARCHS4 coexpression	0.0148
ZNF423 human tf ARCHS4 coexpression	0.0148
PLXNA2 human tf ARCHS4 coexpression	0.0148
IRX6 human tf ARCHS4 coexpression	0.0148
NEUROG1 human tf ARCHS4 coexpression	0.0148
POU4F2 human tf ARCHS4 coexpression	0.0148
PRDM6 human tf ARCHS4 coexpression	0.0148
SHOX2 human tf ARCHS4 coexpression	0.0148
RORB human tf ARCHS4 coexpression	0.0148
RBM20 human tf ARCHS4 coexpression	0.0148
CREB3L1 human tf ARCHS4 coexpression	0.0311
FOXL1 human tf ARCHS4 coexpression	0.0311
PCSK6 human tf ARCHS4 coexpression	0.0311
TEAD1 human tf ARCHS4 coexpression	0.0311
SOX18 human tf ARCHS4 coexpression	0.0311
HIC1 human tf ARCHS4 coexpression	0.0311
ZBTB32 human tf ARCHS4 coexpression	0.0311
POU2F2 human tf ARCHS4 coexpression	0.0311
NRK human tf ARCHS4 coexpression	0.0311
INSM1 human tf ARCHS4 coexpression	0.0311
SIX1 human tf ARCHS4 coexpression	0.0311
TP63 human tf ARCHS4 coexpression	0.0311
ETV1 human tf ARCHS4 coexpression	0.0311
TBR1 human tf ARCHS4 coexpression	0.0311
ZNF248 human tf ARCHS4 coexpression	0.0311
ZFHX2 human tf ARCHS4 coexpression	0.0311
ZFAT human tf ARCHS4 coexpression	0.0313
