# Supplementary material for: Combating pancreatic cancer with ovarian cancer cells
Source: publisher site journal article supplement (doi:10.18632/aging.204608), 2023-03-23
Supplement: Supplementary file [file aging-v15i6-204608-supplementary-material-SD3.pdf]

**Supplementary File 5. The significant genes connected with DEGs.**

| <b>Term</b> | <b>FDR</b>  |
|-------------|-------------|
| GDF11       | 0.000000193 |
| GSTT1       | 0.0000011   |
| FN1         | 0.0000011   |
| ITGA4       | 0.0000011   |
| TUBB1       | 0.0000284   |
| TUBB3       | 0.000354    |
| HSPA5       | 0.000445    |
